# Supplementary material
Source: Research Square preprint supplement (doi:10.21203/rs.3.rs-8402022/v1)
Supplement: Supplementary file 2 [file a10efa0914e512969fcea4ed.docx]

| **Variable** | **Notes/Format** | **Study 1** | **Study 2** | **Study 3** |
| --- | --- | --- | --- | --- |
| **Study ID** | Unique code (e.g., S001_Smith_2023) |  |  |  |
| **First Author** | Surname only |  |  |  |
| **Year** | YYYY format |  |  |  |
| **Country** | Country of study conduct |  |  |  |
| **DOI/PubMed ID** | Linkable identifier |  |  |  |
| **Setting** | Outpatient clinic / Hospital / Research center |  |  |  |
| **Location (Urban/Rural)** | Urban / Rural / Both |  |  |  |
| **Recruitment Method** | Community / Referral / Consecutive sampling |  |  |  |
| **Study Design** | Parallel RCT / Cluster RCT / Crossover |  |  |  |
| **Study Duration** | Weeks from start to final follow-up |  |  |  |
| **Ethics Approval** | Reported (Yes/No/Unclear) |  |  |  |
| **Lost to Follow-up %** | Percentage lost |  |  |  |

**STUDY IDENTIFICATION & CHARACTERISTICS**

### ****POPULATION DETAILS****

| **Variable** | **Notes/Format** | **Study 1** | **Study 2** | **Study 3** |
| --- | --- | --- | --- | --- |
| **Total Sample Size** | N randomized |  |  |  |
| **Sample Size (Probiotic + OIT)** | n in probiotic arm |  |  |  |
| **Sample Size (OIT Alone)** | n in comparator arm |  |  |  |
| **Age Range** | e.g., 4–16 years |  |  |  |
| **Mean Age (± SD)** | As reported |  |  |  |
| **Gender Distribution** | % male, % female |  |  |  |
| **Allergen Type** | Peanut / Milk / Egg / Multiple / Other |  |  |  |
| **Baseline Specific IgE** | Mean ± SD (kU/L) |  |  |  |
| **Inclusion Criteria** | Text summary |  |  |  |
| **Exclusion Criteria** | Text summary |  |  |  |

### ****INTERVENTION & COMPARATOR DETAILS****

| **Variable** | **Notes/Format** | **Study 1** | **Study 2** | **Study 3** |
| --- | --- | --- | --- | --- |
| **Probiotic Strain(s)** | Full taxonomic name (e.g., *L. rhamnosus* GG) |  |  |  |
| **Number of Strains** | Monostrain / Multistrain |  |  |  |
| **Probiotic Dose** | CFU/day |  |  |  |
| **Probiotic Timing** | Pre-OIT / Concurrent / Both |  |  |  |
| **Probiotic Duration** | Weeks of co-administration |  |  |  |
| **OIT Protocol Type** | Standard / Accelerated (weeks to target) |  |  |  |
| **OIT Target Dose** | mg protein (e.g., 4000 mg peanut) |  |  |  |
| **OIT Dosing Schedule** | Daily / Per protocol specifics |  |  |  |
| **Co-interventions** | Antihistamines / Omalizumab / None |  |  |  |
| **Adherence Reported** | Yes/No; % compliance if available |  |  |  |
| **Comparator Type** | OIT alone / Placebo + OIT |  |  |  |
| **Blinding** | Double-blind / Single-blind / Open-label |  |  |  |

### ****OUTCOMES****

PRIMARY OUTCOME

| **Variable** | **Notes/Format** | **Study 1** | **Study 2** | **Study 3** |
| --- | --- | --- | --- | --- |
| **SU Rate** | n/N achieving SU at 2–4 weeks post-cessation |  |  |  |
| **Effect Size (RR, 95% CI)** | If reported |  |  |  |

SECONDARY OUTCOMES

| **Variable** | **Notes/Format** | **Study 1** | **Study 2** | **Study 3** |
| --- | --- | --- | --- | --- |
| **Time to Maintenance Dose** | Weeks to target dose (mean ± SD) |  |  |  |
| **Effect Size (MD/HR)** | Only if time-to-event data available |  |  |  |
| **SU Assessment Timing** | Weeks post-OIT discontinuation (for SU measurement) |  |  |  |
| **Desensitization Rate** | n/N at 3, 6, 12 months |  |  |  |
| **Specific IgE** | IU/mL at baseline & 6–12 months (mean ± SD) |  |  |  |
| **Specific IgG4** | IU/mL at baseline & 6–12 months (mean ± SD) |  |  |  |
| **IgE/IgG4 Ratio** | At baseline & 6–12 months (mean ± SD) |  |  |  |

SAFETY & QUALITY OF LIFE

| **Variable** | **Notes/Format** | **Study 1** | **Study 2** | **Study 3** |
| --- | --- | --- | --- | --- |
| **Adverse Events (Total)** | n/N or total events |  |  |  |
| **Adverse Events (Gastrointestinal)** | n/N or total events |  |  |  |
| **Adverse Events (Allergic Reactions)** | n/N or total events |  |  |  |
| **Quality of Life Score** | Baseline, 6 months, end of treatment (mean ± SD) |  |  |  |
| **QoL Instrument Used** | FAQLQ-PF / Other (specify in notes) |  |  |  |

**RISK OF BIAS (RoB-2)**

| **Domain** | **Judgment** | **Study 1** | **Study 2** | **Study 3** |
| --- | --- | --- | --- | --- |
| **D1: Randomization Process** | Low / High / Some concerns |  |  |  |
| **D2: Deviations from Intended Interventions** | Low / High / Some concerns |  |  |  |
| **D3: Missing Outcome Data** | Low / High / Some concerns |  |  |  |
| **D4: Outcome Measurement** | Low / High / Some concerns |  |  |  |
| **D5: Selection of Reported Results** | Low / High / Some concerns |  |  |  |
| **Overall Risk** | Low / High / Some concerns |  |  |  |
| **Rationale** | Text justification |  |  |  |

### ****ADMINISTRATIVE NOTES****

| **Variable** | **Notes/Format** | **Study 1** | **Study 2** | **Study 3** |
| --- | --- | --- | --- | --- |
| **Funding Source** | Reported funding source |  |  |  |
| **Conflict of Interest** | Yes/No/Unclear; Details |  |  |  |
| **Contact with Authors** | Yes/No; reason and outcome |  |  |  |
| **Reviewer Remarks** | Any observations |  |  |  |
| **Data Extracted By** | Reviewer initials |  |  |  |
| **Date of Extraction** | DD/MM/YYYY |  |  |  |
