# Supplementary material
Source: Research Square preprint supplement (doi:10.21203/rs.3.rs-8402022/v1)
Supplement: Supplementary file 3 [file bb10353f9a4c89e1cbd303ec.docx]

**Search strategy for Pubmed:**

# Population: Children with IgE-mediated food allergy

("Food Hypersensitivity"[Mesh] OR "Food Hypersensitivity"[tiab] OR "food allergy"[tiab] OR

"food allergies"[tiab] OR "allergic reaction to food"[tiab] OR "food allergic disease"[tiab] OR

"peanut allergy"[tiab] OR "peanut allergic"[tiab] OR "egg allergy"[tiab] OR "egg allergic"[tiab] OR

"milk allergy"[tiab] OR "cow's milk allergy"[tiab] OR "cow milk allergy"[tiab] OR

"cows milk allergy"[tiab] OR "tree nut allergy"[tiab] OR "tree-nut allergy"[tiab] OR

"walnut allergy"[tiab] OR "hazelnut allergy"[tiab] OR "fish allergy"[tiab] OR

"shellfish allergy"[tiab] OR "food anaphylaxis"[tiab])

AND

# Intervention: Probiotics co-administered with OIT

("Probiotics"[Mesh] OR "Probiotics"[tiab] OR probiotic*[tiab] OR "probiotic supplementation"[tiab] OR

"probiotic therapy"[tiab] OR Lactobacillus[tiab] OR Lactobacilli[tiab] OR Bifidobacterium[tiab] OR

Bifidobacteria[tiab] OR "Lactobacillus rhamnosus"[tiab] OR "L. rhamnosus"[tiab] OR LGG[tiab] OR

"Lactobacillus casei"[tiab] OR "L. casei"[tiab] OR "Lactobacillus acidophilus"[tiab] OR

"L. acidophilus"[tiab] OR "Lactobacillus plantarum"[tiab] OR "Bifidobacterium lactis"[tiab] OR

"Bifidobacterium breve"[tiab] OR "Bifidobacterium longum"[tiab] OR "Bifidobacterium infantis"[tiab] OR

"synbiotic"[tiab] OR "live microorganisms"[tiab] OR "beneficial bacteria"[tiab])

AND

# Intervention: Oral Immunotherapy

("Desensitization, Immunologic"[Mesh] OR "Oral Immunotherapy"[tiab] OR "oral immunotherapy"[tiab] OR

OIT[tiab] OR "food immunotherapy"[tiab] OR "food OIT"[tiab] OR "allergen immunotherapy"[tiab] OR

"specific oral tolerance induction"[tiab] OR "specific oral tolerance"[tiab] OR "oral tolerance induction"[tiab] OR

"oral desensitization"[tiab] OR "oral allergen desensitization"[tiab] OR "allergen desensitization"[tiab] OR

"allergen-specific immunotherapy"[tiab] OR "sublingual immunotherapy"[tiab] OR SLIT[tiab])

AND

# Population: Children and adolescents

("Child"[Mesh] OR "Adolescent"[Mesh] OR child*[tiab] OR infant*[tiab] OR toddler*[tiab] OR

pediatric[tiab] OR paediatric[tiab] OR preschooler*[tiab] OR "pre-school"[tiab] OR

teenager*[tiab] OR adolescent*[tiab] OR youth*[tiab] OR "under 18"[tiab])

AND

# Study Design: Randomized controlled trials

(randomized controlled trial[pt] OR controlled clinical trial[pt] OR "randomized controlled trial"[tiab] OR

"randomised controlled trial"[tiab] OR "randomized clinical trial"[tiab] OR "randomised clinical trial"[tiab] OR

randomized[tiab] OR randomised[tiab] OR randomly[tiab] OR placebo[tiab] OR "clinical trial"[pt] OR

"controlled trial"[tiab] OR "random allocation"[Mesh] OR "double-blind method"[Mesh])

Example for PubMed:

#1 ("Food Hypersensitivity"[Mesh] OR "food allergy"[tiab] OR "peanut allergy"[tiab] OR "egg allergy"[tiab] OR "milk allergy"[tiab] OR "cow's milk allergy"[tiab])

#2 ("Probiotics"[Mesh] OR Probiotic*[tiab] OR Lactobacillus[tiab] OR Bifidobacterium[tiab] OR "Lactobacillus rhamnosus"[tiab] OR LGG[tiab])

#3 ("Desensitization, Immunologic"[Mesh] OR "Oral immunotherapy"[tiab] OR OIT[tiab] OR "food immunotherapy"[tiab] OR "Specific Oral Tolerance Induction"[tiab] OR "oral desensitization"[tiab])

#4 (child*[tiab] OR pediatric[tiab] OR paediatric[tiab] OR infant*[tiab] OR adolescent*[tiab])

#5 (#1 AND #2 AND #3 AND #4)

#6 (randomized controlled trial[pt] OR controlled clinical trial[pt] OR randomized[tiab] OR randomised[tiab] OR placebo[tiab] OR clinical trials as topic[mh:nocxp] OR randomly[tiab] OR trial[ti])

#7 (#5 AND #6)

#8 #7 AND (2010/01/01:2025/01/12[pdat])

Or effectively:

("Food Hypersensitivity"[MeSH Terms] OR "food allergy"[Title/Abstract] OR "peanut allergy"[Title/Abstract] OR "egg allergy"[Title/Abstract] OR "milk allergy"[Title/Abstract] OR "cow's milk allergy"[Title/Abstract]) AND ("Probiotics"[MeSH Terms] OR "probiotic*"[Title/Abstract] OR "Lactobacillus"[Title/Abstract] OR "Bifidobacterium"[Title/Abstract] OR "Lactobacillus rhamnosus"[Title/Abstract] OR "LGG"[Title/Abstract]) AND ("desensitization, immunologic"[MeSH Terms] OR "Oral immunotherapy"[Title/Abstract] OR "OIT"[Title/Abstract] OR "food immunotherapy"[Title/Abstract] OR "Specific Oral Tolerance Induction"[Title/Abstract] OR "oral desensitization"[Title/Abstract]) AND ("child*"[Title/Abstract] OR "pediatric"[Title/Abstract] OR "paediatric"[Title/Abstract] OR "infant*"[Title/Abstract] OR "adolescent*"[Title/Abstract]) AND ("randomized controlled trial"[Publication Type] OR "controlled clinical trial"[Publication Type] OR "randomized"[Title/Abstract] OR "randomised"[Title/Abstract] OR "placebo"[Title/Abstract] OR "clinical trials as topic"[MeSH Terms:noexp] OR "randomly"[Title/Abstract] OR "trial"[Title]) AND 2010/01/01:2025/01/12[Date - Publication]

**Search strategy for Embase via Ovid**

# Population: Children with IgE-mediated food allergy

exp food allergy/ or (food allergy* or peanut allergy* or egg allergy* or milk allergy* or cow's milk allergy* or cow milk allergy* or tree nut allergy* or walnut allergy* or hazelnut allergy* or fish allergy* or shellfish allergy* or food anaphylaxis*).ti,ab,kw.

# Intervention: Probiotics co-administered with OIT

exp probiotic agent/ or (probiotic* or lactobacillus or bifidobacterium or lactobacillus rhamnosus or LGG or lactobacillus casei or lactobacillus acidophilus or lactobacillus plantarum or bifidobacterium lactis or bifidobacterium breve or bifidobacterium longum or bifidobacterium infantis or synbiotic* or live microorganism* or beneficial bacteria*).ti,ab,kw.

# Intervention: Oral Immunotherapy

exp oral immunotherapy/ or (oral immunotherapy or OIT or food immunotherapy or Specific Oral Tolerance Induction or specific oral tolerance or oral tolerance induction or oral desensitization or oral allergen desensitization or allergen desensitization or allergen-specific immunotherapy or sublingual immunotherapy or SLIT).ti,ab,kw.

# Population: Children and adolescents

exp child/ or exp adolescent/ or (child* or pediatric or paediatric or infant* or toddler* or preschooler* or pre-school* or teenager* or adolescent* or youth* or under 18).ti,ab,kw.

# Study Design: Randomized controlled trials

exp randomized controlled trial/ or (randomized or randomised or placebo or randomly or trial or randomized controlled trial or randomised controlled trial).ti,ab,kw.

Example for Embase via Ovid

1. exp food allergy/ OR (food allergy* OR peanut allergy* OR egg allergy* OR milk allergy* OR cow's milk allergy*).ti,ab,kw.

2. exp probiotic/ OR (probiotic* OR lactobacillus OR bifidobacterium OR lactobacillus rhamnosus OR LGG).ti,ab,kw.

3. exp oral immunotherapy/ OR (oral immunotherapy OR OIT OR food immunotherapy OR Specific Oral Tolerance Induction OR oral desensitization).ti,ab,kw.

4. (child* OR pediatric OR paediatric OR infant* OR adolescent*).ti,ab,kw.

5. 1 AND 2 AND 3 AND 4

6. randomized controlled trial/ OR (randomized OR randomised OR placebo OR randomly OR trial).ti,ab,kw.

7. 5 AND 6

8. limit 7 to yr="2010 - 2025"
